# Supplementary material
Source: Springer Nature journal article supplement (https://www.springermedizin.de/resource/supplementary/12960_2010_256_MOESM4_ESM.pdf/9570754)

# IMPLEMENTATION OF HRH ELEMENTS OF SUS

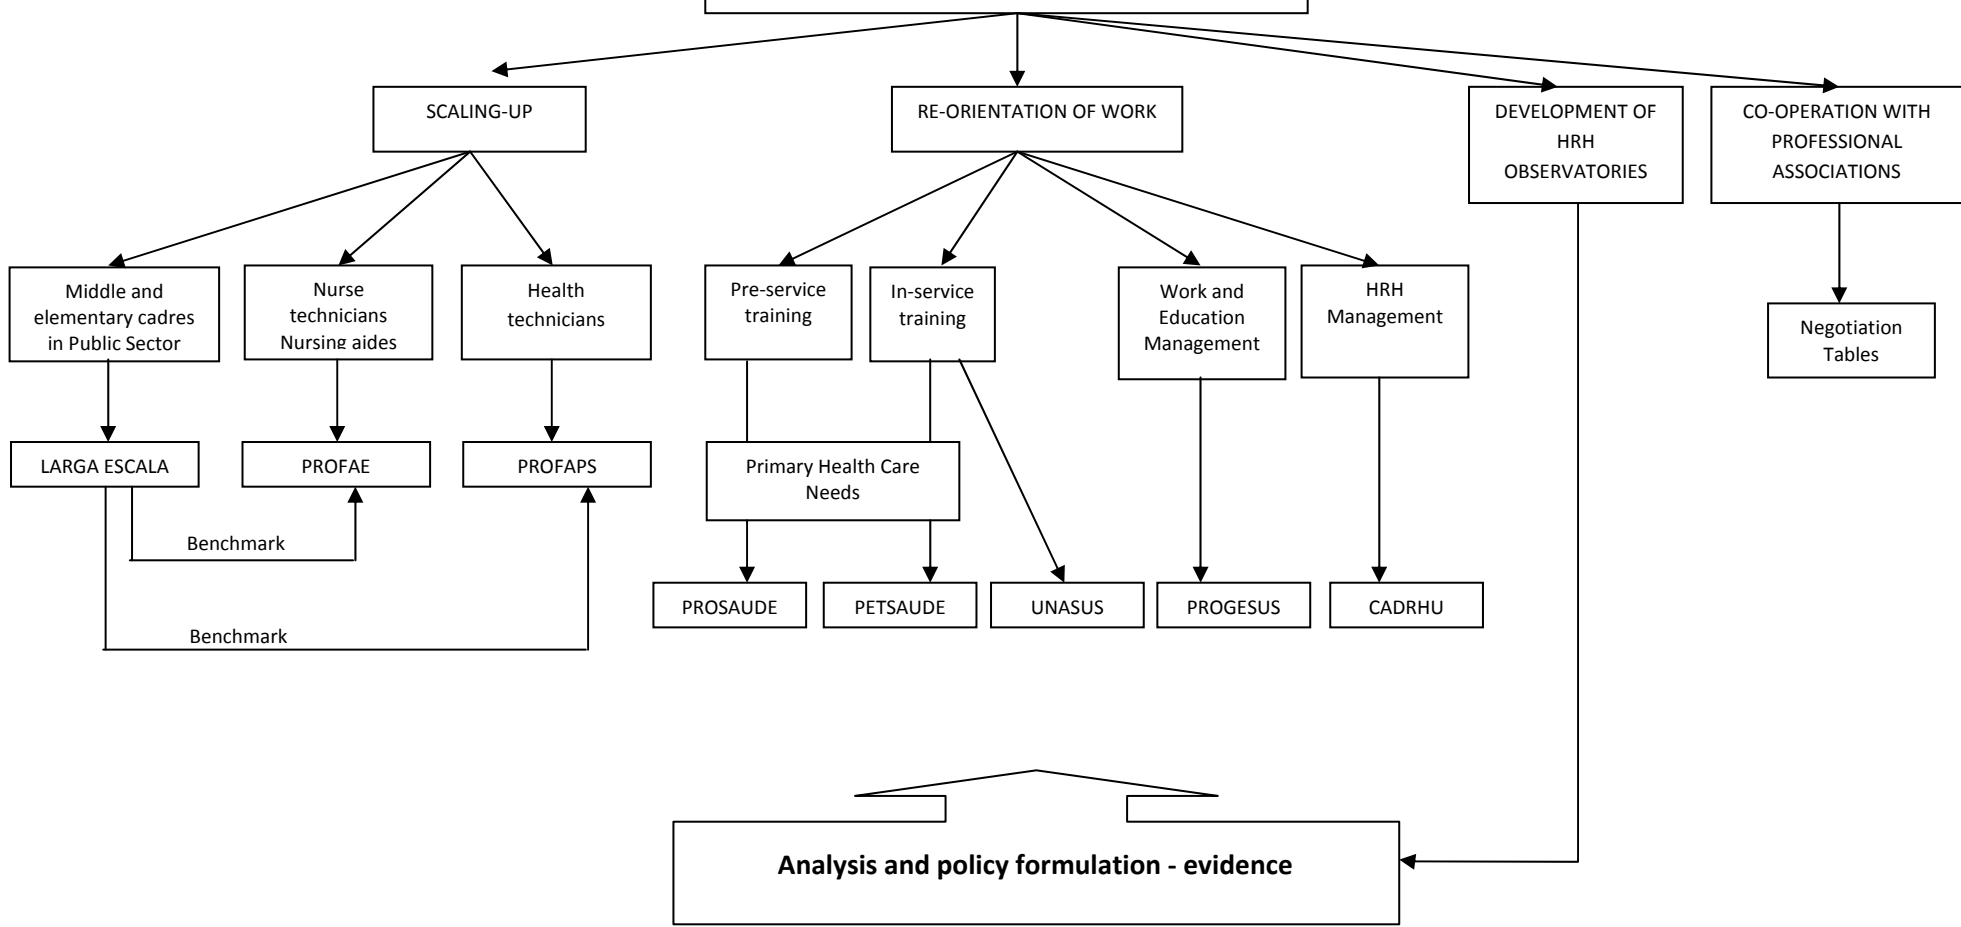

Supplement: MOESM4 [file 9570754]
